# Supplementary material for: Effect of Spironolactone on Atrial Fibrillation in Patients with Heart Failure with Preserved Ejection Fraction: Post-Hoc Analysis of the Randomized, Placebo-Controlled TOPCAT Trial
Source: Springer Nature journal article supplement (doi:10.1007/s40256-019-00353-5), 2019-06-19
Supplement: MOESM1 [file 24108324]

**Spironolactone does not prevent atrial fibrillation in patients with heart failure with preserved ejection fraction: post hoc analysis of the randomized, placebo controlled TOPCAT trial**

Jolien Neefs MD, Nicoline W.E. van den Berg MD, Sébastien P.J. Krul, MD, PhD, S. Matthijs Boekholdt, MD, PhD, Joris R. de Groot MD, PhD

**Address for correspondence:**

J.R. de Groot, MD, PhD  
Department of Cardiology  
Amsterdam UMC, University van Amsterdam  
Meibergdreef 9, 1105 AZ Amsterdam  
T: +3120-5661409  
E: [j.r.degroot@amc.uva.nl](mailto:j.r.degroot@amc.uva.nl)

**Online Figure 1.** Forest plot of the hazard ratios of the risk of the primary composite outcome of death from cardiovascular causes, aborted cardiac arrest, or hospitalization for the management of heart failure in either patients with a history of AF at baseline.

|                                      | <b>HR</b> | <b>95% CI</b> | <b>p</b> | <b>Cases</b> |
|--------------------------------------|-----------|---------------|----------|--------------|
| <b>Primary endpoint</b>              | 0.87      | 0.71 1.07     | 0.18     | 369/2,228    |
| <b>CVD Death</b>                     | 0.84      | 0.63 1.12     | 0.23     | 184/2,228    |
| <b>Aborted Cardiac arrest</b>        | 0.50      | 0.09 2.72     | 0.42     | 6/2,228      |
| <b>Hospitalization for HF</b>        | 0.79      | 0.62 1.02     | 0.08     | 240/2,228    |
| <b>Death from any cause</b>          | 0.89      | 0.71 1.12     | 0.34     | 292/2,228    |
| <b>Hospitalization for any cause</b> | 0.95      | 0.83 1.08     | 0.42     | 882/2,228    |
| <b>Myocard infarction</b>            | 0.80      | 0.52 1.23     | 0.31     | 83/2,228     |
| <b>Stroke</b>                        | 0.86      | 0.51 1.45     | 0.57     | 56/2,228     |

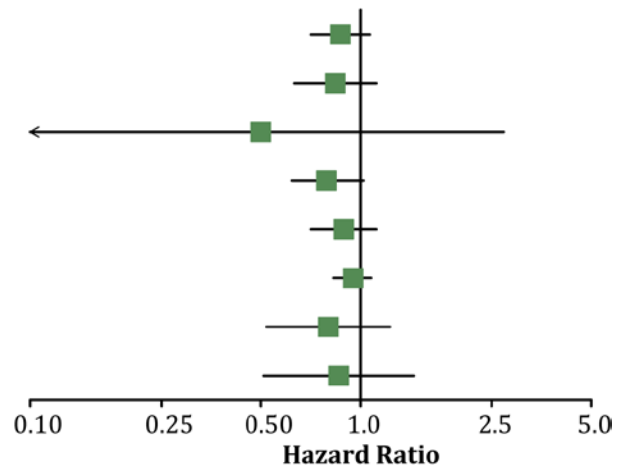

*CVD* cardiovascular disease, *HF* heart failure

**Online Figure 2.** Forest plot of the hazard ratios of the risk of the primary composite outcome of death from cardiovascular causes, aborted cardiac arrest, or hospitalization for the management of heart failure in either patients without a history of AF at baseline.

|                                      | <b>HR</b> | <b>95% CI</b> | <b>p</b> | <b>Cases</b> |
|--------------------------------------|-----------|---------------|----------|--------------|
| <b>Primary endpoint</b>              | 1.26      | 0.87 1.84     | 0.22     | 112/505      |
| <b>CVD Death</b>                     | 1.30      | 0.75 2.25     | 0.36     | 52/505       |
| <b>Aborted Cardiac arrest</b>        | N/A       | N/A N/A       | N/A      | 1/505        |
| <b>Hospitalization for HF</b>        | 1.18      | 0.74 1.88     | 0.48     | 72/505       |
| <b>Death from any cause</b>          | 1.21      | 0.78 1.87     | 0.39     | 82/505       |
| <b>Hospitalization for any cause</b> | 1.02      | 0.81 1.29     | 0.84     | 288/505      |
| <b>Myocard infarction</b>            | 1.01      | 0.46 2.20     | 0.99     | 25/505       |
| <b>Stroke</b>                        | 1.61      | 0.64 4.10     | 0.32     | 19/505       |

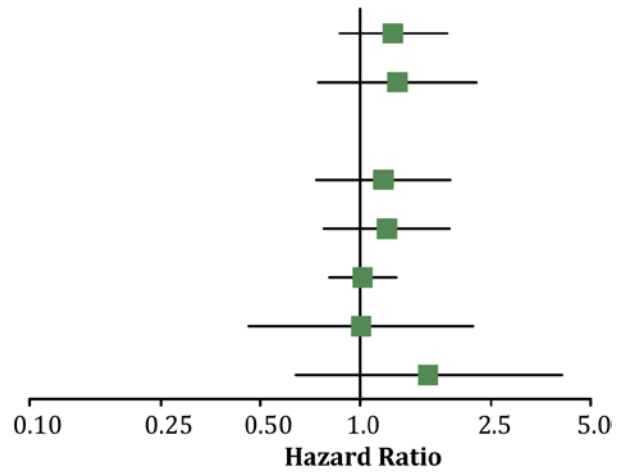

CVD cardiovascular disease, HF heart failure

**Online Figure 3.** Subgroup analyses of the hazard ratios of new-onset atrial fibrillation according to subgroups pre-specified in the main TOPCAT publication.

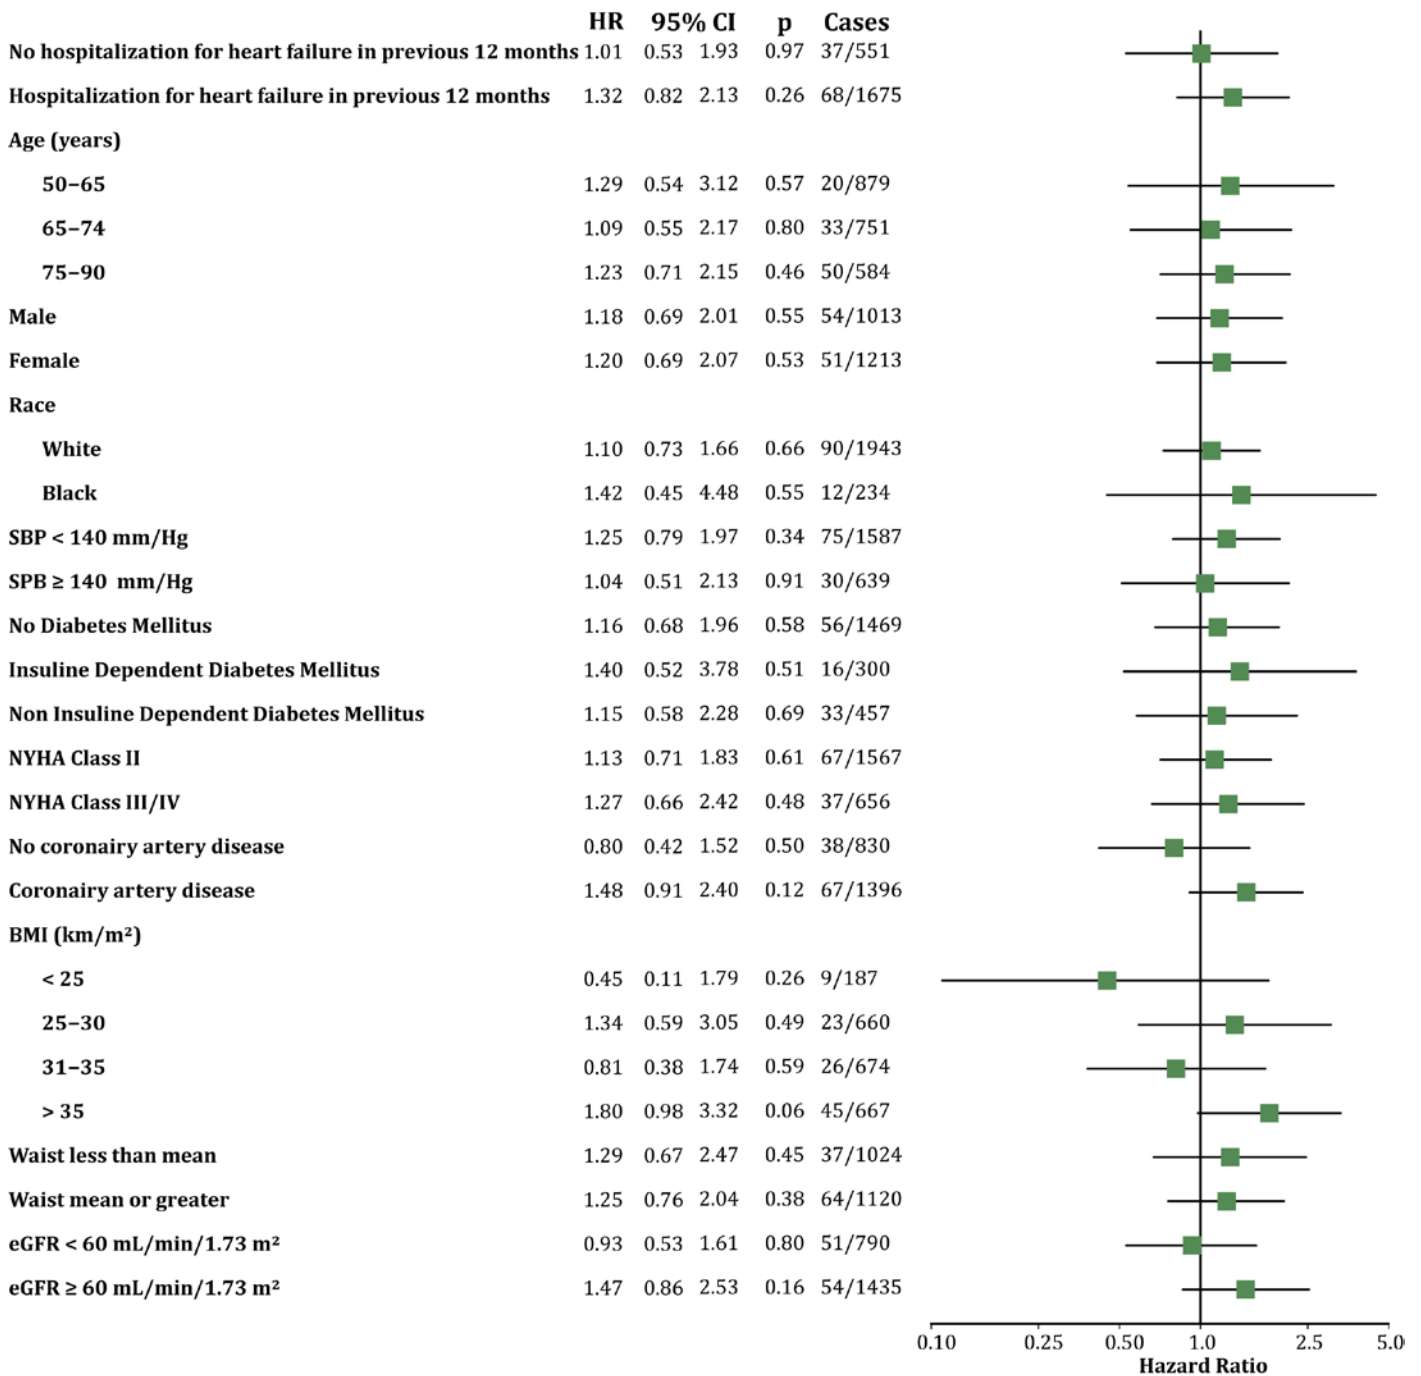

*BMI* body mass index, *eGFR* estimated glomerular filtration rate, *NYHA* New York Heart Association, *SBP* systolic blood pressure.

**Online Figure 4.** Subgroup analyses of the hazard ratios of recurrence of atrial fibrillation according to subgroups pre-specified in the main TOPCAT publication.

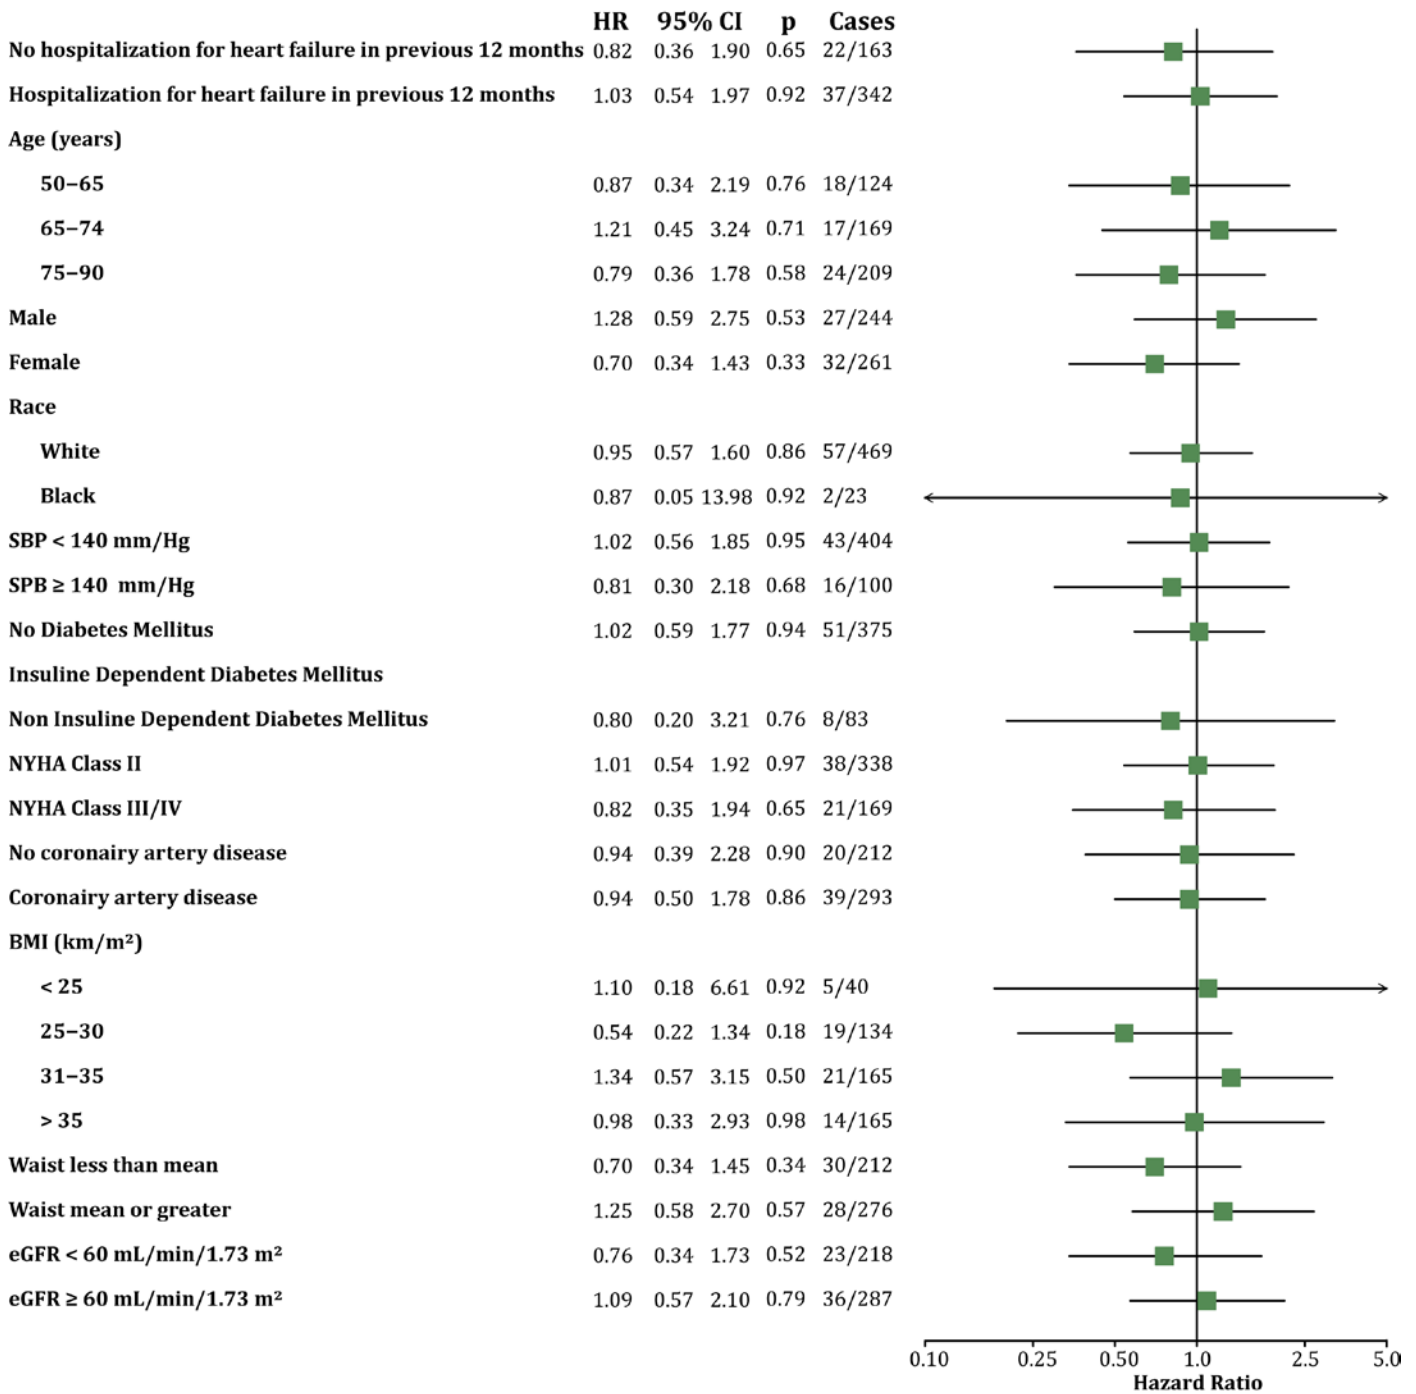

*BMI* body mass index, *eGFR* estimated glomerular filtration rate, *NYHA* New York Heart Association, *SBP* systolic blood pressure.
